# Supplementary material for: Ultrasound phase microscopy for rapid label-free super-resolution vascular imaging
Source: Research Square preprint supplement (doi:10.21203/rs.3.rs-9488223/v1), 2026-05-11
Supplement: Supplementary file 1 [file 136306615baedbadcaf4affb.docx]

**Supplementary Information for**

**Ultrasound phase microscopy for rapid label-free super-resolution vascular imaging**

**Supplementary Discussion 1: Theoretical resolution limit analysis of ultrasound phase microscopy**

In this part, the theoretical resolution limit of UPM will be derived.

The far field approximated response of the apodization from a non-zero constant dc offset γ can be written as

Where N is the number of elements in the ultrasound array, d is the element spacing or the pitch of the ultrasound array, and is the lateral wavenumber. As the non-zero constant apodization is an even function, it is far field approximated response is pure real.

The far field approximated response of can be written as

As is an odd function, its far field approximated response is pure imaginary.

Then the far field approximated response of and can be written as

To ease the analysis, the responses are converted to polar coordinate, and the angle component can be expressed as

As ,

We can rewrite it as

Then we have

Similarly

To ease the analysis, we define . Then we have the polar coordinate expression of three apodizations’ response as

Where M is the magnitude.

If we assume the scatter moves in axial direction has an initial phase of and a relative phase offset is generated between two consecutive frames. Then the beamformed signals can be expressed as

Then we have

Similarly

We also have

Similarly, we have

Then we have and expressed as

Because of the existence of wrap function, there are two cases for . When we have , , and . When we have , , and . As we have , , and , equals to when

And equals to 0 otherwise.

From this derivation, UPM algorithm functions as a spatial gate that outputs within a very narrow angular limit. And the width of the spatial gate is linear to the relative phase offset which means it is also linear to the scatter velocity.

The width of the spatial gate can be modified in post processing by . However, the spatial resolution cannot improve unlimitedly by reducing . From the derivation below, we can find out that the signal to noise ratio (SNR) determines the ultimate resolution that UPM algorithm could achieve.

With , we can estimate the effective SNR near the center as

where is the original SNR.

This is because when we are looking at the signals near the center, . Then the effective signal power is . Because is orthogonal to the non-zero constant dc offset apodization. The effective noise power is . As is always much smaller than 1. The effective noise power can be approximated as .

Then the standard deviation of the phase noise can be estimated as1

If we define the minimum resolvable angle of UPM algorithm as , then we can derive according to the phase noise and the spatial phase gradient which can be expressed as

And we have

where is canceled out.

From this derivation, the resolution of UPM algorithm is no longer diffraction limited (). Instead, the resolution of UPM is limited by SNR. We can also derive the optimal to use in UPM given SNR.

We assume when , the scatter is right in front of the array, . If we want to keep signals within two standard deviations, we have

Then we have

To achieve the optimal spatial resolution, smaller is preferable. Then we have

From this expression, we can observe that the is determined by two variables, and . When we have higher SNR or faster flow, we can use smaller to achieve a narrower spatial gate.

To summarize, the theory behind UPM is derived. Different from conventional beamforming whose resolution limit is determined by the wavelength or diffraction, UPM’s spatial resolution limit is also determined by the SNR. The higher the SNR, the higher the improvement UPM could provide. Besides, the optimal dc offset is also derived. Though we have the expression of , we still use a constant empirical because the flow velocity is not a prior in the beamforming process.

**Supplementary Discussion 2: Computational Cost Analysis of Ultrasound Phase Microscopy**

In this section, we analyze the computational cost of the UPM algorithm and demonstrate its efficiency compared to conventional DAS used in CFI.

Although the UPM process theoretically requires three distinct apodization weights to generate the desired phase responses, we can factorize these apodizations to optimize computational efficiency. We define two orthogonal apodizations, and . For , the weights on the left half of the sub aperture are set to 1, while the right half is 0. Conversely, , has 0 on the left and 1 on the right.

The three apodizations we need in UPM (,, and ) can be synthesized from and as follows:

where corresponds to the uniform rectangular apodization conventionally used in standard DAS beamforming.

Because the beamforming process is fundamentally a linear spatial filtering process, we do not need to apply three apodizations to the raw channel data independently. Instead, we can first compute the beamformed outputs using only and and use Eq. 44-47 to achieve the desired beamformed data. As a result, UPM’s beamforming cost can be reduced from to .

Assuming the ultrasound array has elements, each acquisition has samples per element, and the sub aperture size is . The total floating-point operations (FLOPs) required for conventional DAS beamforming per acquisition is proportional to

For UPM

Then it is obvious that in the beamforming stage, UPM only needs extra operations (Eq. 44-47) compared to DAS. Given that the sub aperture size is significantly larger than 4, the extra computational overhead of UPM is negligible. After the beamforming, UPM requires four relative phase offset calculations and a final phase summation on each pixel to finalize the processing. As these operations are performed on the beamformed pixels, the computational costs of these operations are all proportional to instead of . Therefore, UPM can achieve super-resolution imaging with a computational cost at the same order as that of standard DAS, providing real-time imaging potential.


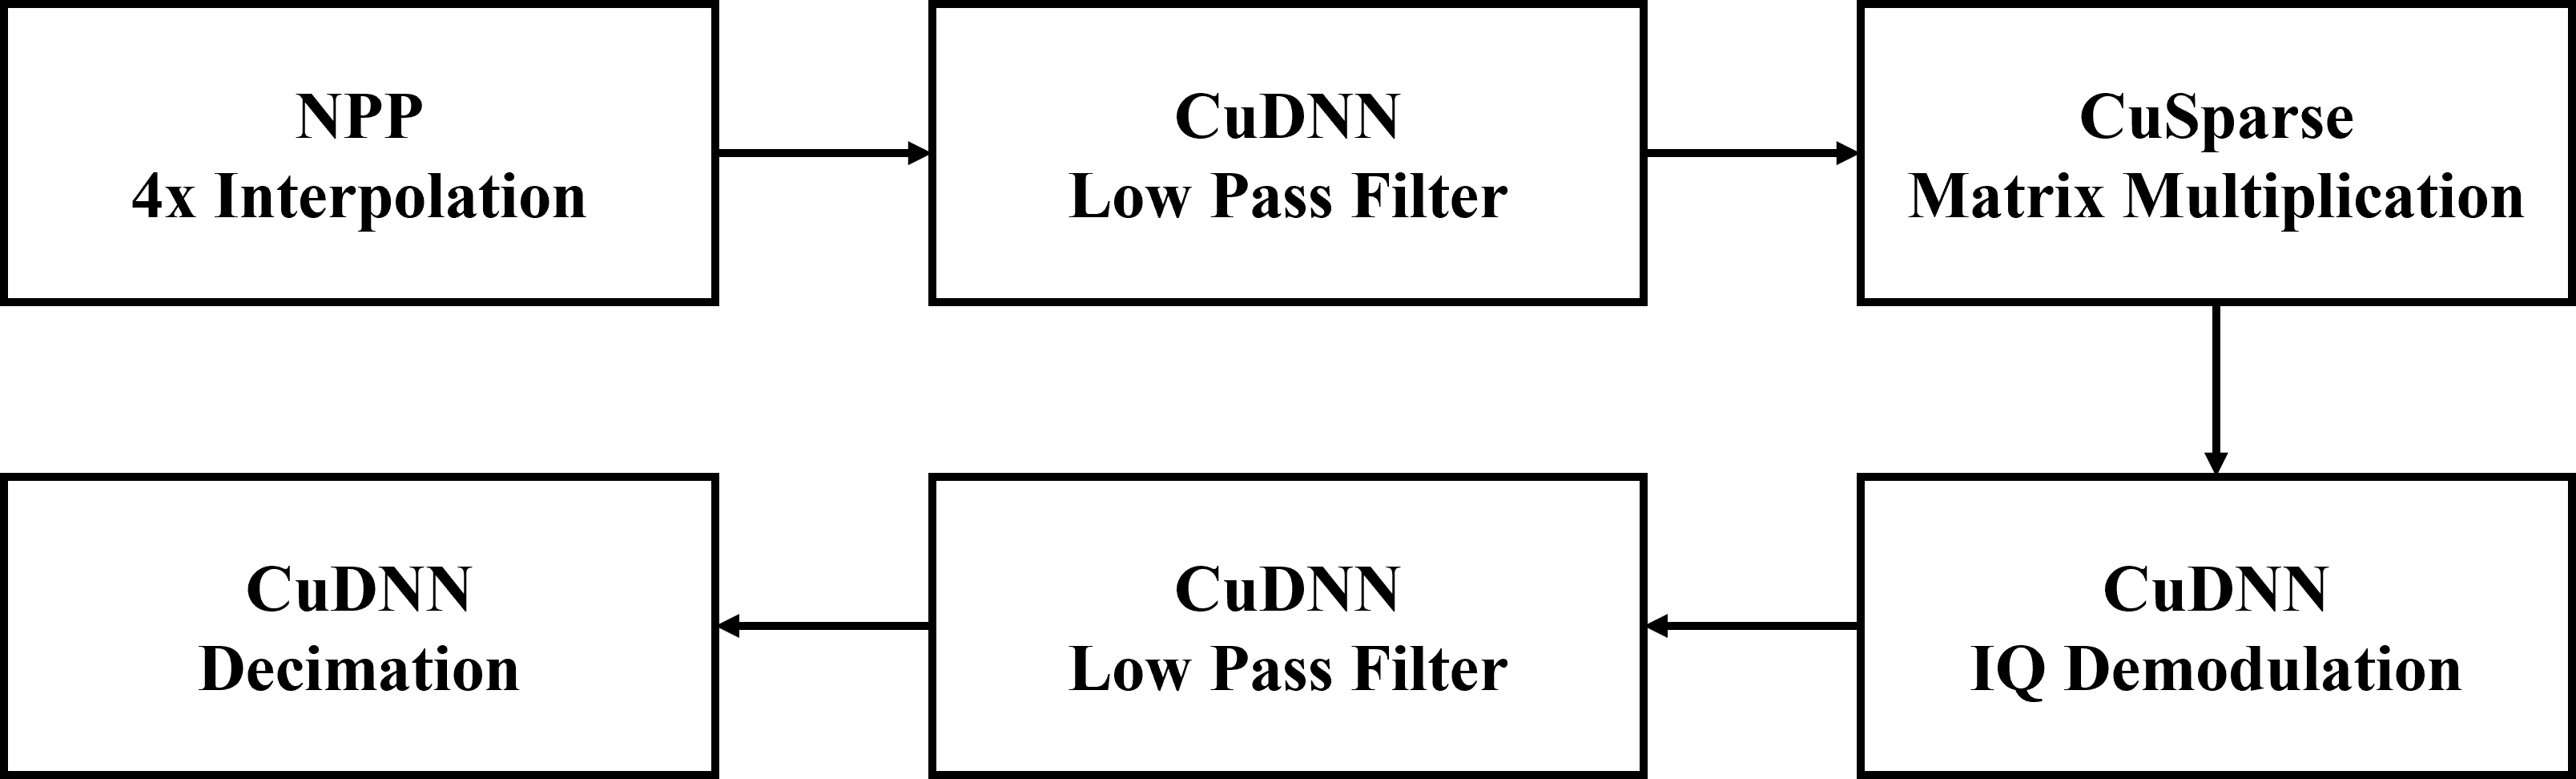


**Supplementary Figure 1 | GPU acceleration of UPM beamforming.** The raw ultrasound channel RF data are first interpolated by a factor of 4 to improve the delay accuracy. A low pass filter is applied after the interpolation to remove the spectral images. Then the raw channel data is multiplied with the beamforming matrix to complete the delay-and-sum process. A complex carrier is then multiplied with the beamforming RF data to demodulate the beamformed RF signal to baseband IQ signal. Then a low pass filter is applied before the decimation to prevent aliasing.

|  | Verasonics Vantage | Verasonics NXT |
| --- | --- | --- |
| Sampling Frequency | 62.5 MHz | 125 MHz |
| Quantization Depth | 14 -bit | 16-bit |
| Buffer Size | 16GB | 64GB |
| Bandwidth | 2 MHz to 42 MHz | 1 MHz to 60 MHz |
| Data Type | 16-bit integer | 16-bit float |

**Supplementary Tabel 1 | System specifications for both new generation and previous generation ultrasound imaging research platforms.** New generation provides higher sampling frequency, bandwidth, buffer size, and quantization depth compared to the previous generation.

|  | MS200 | MS550D | MS550S | MS700 |
| --- | --- | --- | --- | --- |
| Bandwidth | 9-18 MHz | 20-55 MHz | 32-56 MHz | 30-70 MHz |
| Pitch | 125 µm | 55 µm | 55 µm | 38 µm |
| Voltage | 30 V | 25 V | 25 V | 20 V |

**Supplementary Tabel 2 | Ultrasound transducer array specifications.** The bandwidth and pitch come from the manufacturer provided information. The voltage is the actual voltage used in data acquisition.

| Batch Size | 8 frames | 16 frames | 32 frames |
| --- | --- | --- | --- |
| Mean | 2.3232 s | 2.2133 s | 2.2438 s |
| STD | 0.0945 s | 0.0951 s | 0.1031 s |

**Supplementary Tabel 3 | Beamforming time measurements with GPU acceleration.** The UPM beamforming time of each functional ultrasound acquisition (640 frames) was measured by repeatedly running the GPU beamforming program 100 times.

Captions for Supplementary Videos

Supplementary Video 1 | 50 MHz UPM images of label-free mouse brain.

Supplementary Video 2 | 40 MHz UPM images of label-free mouse brain.

Supplementary Video 3 | 30 MHz UPM images of label-free mouse brain.

Supplementary Video 4 | 30 MHz UPM images of label-free rat brain.

Supplementary Video 5 | 30 MHz UPM images of label-free rat spinal cord segment 1.

Supplementary Video 6 | 30 MHz UPM images of label-free rat spinal cord segment 2.

References

1. Czarske, J. W. Statistical frequency measuring error of the quadrature demodulation technique for noisy single-tone pulse signals. *Meas. Sci. Technol.* **12**, 597–614 (2001).
